# Supplementary material
Source: HighWire-hosted journal article supplement (https://cancerres.aacrjournals.org/content/suppl/2010/01/12/0008-5472.CAN-09-1417)
Supplement: stable_1.pdf [file stable_1.pdf]

# Supplementary Table 1

| Cell Line  | Disease                          | EGFR level | IC <sub>50</sub> µg/ml |       |        |
|------------|----------------------------------|------------|------------------------|-------|--------|
|            |                                  |            | 992                    | 1024  | Sym004 |
| A431       | Epidermoid carcinoma             | ++++       | 0.290                  | 0.026 | 0.020  |
| A431NS     | Epidermoid carcinoma             | ++++       | 1.883                  | 8.161 | 0.025  |
| H292       | Lung mucoepidermoid              | +++        | 0.217                  | 0.013 | 0.013  |
| HCC827*    | Lung adenocarcinoma              | ++++       | 0.063                  | 0.024 | 0.025  |
| H1975#     | Lung adenocarcinoma              | ++         | 0.036                  | 0.237 | 0.013  |
| CALU-3     | Lung adenocarcinoma              | ++         | NE                     | NE    | 0.793  |
| A549§      | Lung carcinoma                   | ++         | NE                     | NE    | NE     |
| HN5        | Squamous carcinoma head and neck | ++++       | 0.426                  | 0.047 | 0.027  |
| SKBR-3     | Breast adenocarcinoma            | (+)        | NE                     | NE    | NE     |
| BT474      | Breast ductal carcinoma          | +          | NE                     | NE    | NE     |
| MDA-MB-468 | Breast adenocarcinoma            | +++        | NE                     | NE    | 0.702  |
| AU565      | Breast adenocarcinoma            | (+)        | NE                     | NE    | 0.375  |
| BT20       | Breast carcinoma                 | ++         | NE                     | NE    | NE     |
| DU145      | Prostate carcinoma               | ++         | NE                     | NE    | 0.464  |
| PC-3§      | Prostate adenocarcinoma          | ++         | NE                     | NE    | NE     |
| GEO        | Colorectal carcinoma             | +          | 0.878                  | 0.015 | 0.002  |
| HT-29      | Colorectal adenocarcinoma        | (+)        | NE                     | NE    | NE     |
| SKOV-3     | Ovary adenocarcinoma)            | +          | NE                     | NE    | NE     |
| MiaPACA-2§ | Pancreas adenocarcinoma          | +          | NE                     | NE    | NE     |

\* The HCC827 cell line contains a deletion in the EGFR tyrosine kinase E746-A750

# The H1975 cell line contains two mutations in the EGFR L858R and T790M

§ These cell lines have mutations in KRAS

++++ = very high, +++ = high, ++ = moderate, + = low, (+) = very low as estimated from immunoblot analyses

NE = No Effect
